# Supplementary material for: Zero-Dimensional Tellurium-Based Organic–Inorganic Hybrid Halide Single Crystal with Yellow-Orange Emission from Self-Trapped Excitons
Source: MDPI journal article supplement (doi:10.3390/nano14010046), 2023-12-22
Supplement: s1 [file s1]

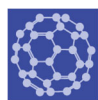

## Supporting Information

# Zero-Dimensional Tellurium-Based Organic–Inorganic Hybrid Halide Single Crystal with Yellow-Orange Emission from Self-Trapped Excitons

Xiangyan Yun <sup>1,2</sup>, Jingheng Nie <sup>3</sup>, Hanlin Hu <sup>4</sup>, Haizhe Zhong <sup>2</sup>, Denghui Xu <sup>1,\*</sup>, Yumeng Shi <sup>5,\*</sup> and Henan Li <sup>5</sup>

<sup>1</sup> Department of Physics, Beijing Technology and Business University, Beijing 100048, China; 2250493009@email.szu.edu.cn

<sup>2</sup> International Collaborative Laboratory of 2D Materials for Optoelectronics Science and Technology of Ministry of Education, Institute of Microscale Optoelectronics, Shenzhen University, Shenzhen 518060, China; haizhe.zhong@szu.edu.cn

<sup>3</sup> Guangdong Rare Earth Photofunctional Materials Engineering Technology Research Center, School of Chemistry and Environment, Jiaying University, Meizhou 514015, China; niejh@jyu.edu.cn

<sup>4</sup> Hoffman Institute of Advanced Materials, Shenzhen Polytechnic, Shenzhen 518060, China; hanlinhu@szpt.edu.cn

<sup>5</sup> School of Electronics and Information Engineering, Shenzhen University, Shenzhen 518060, China; henan.li@szu.edu.cn

\* Correspondence: xudh@btbu.edu.cn (D.X.); yumeng.shi@szu.edu.cn (Y.S.)

**Table S1.** Crystal data and structure refinement for (C<sub>8</sub>H<sub>20</sub>N)<sub>2</sub>TeCl<sub>6</sub> at 193.15 K.

|                                             |                                                                   |
|---------------------------------------------|-------------------------------------------------------------------|
| Empirical formula                           | C <sub>16</sub> H <sub>40</sub> Cl <sub>6</sub> N <sub>2</sub> Te |
| Formula weight                              | 457.24                                                            |
| Temperature/K                               | 193.15                                                            |
| Crystal system                              | monoclinic                                                        |
| Space group                                 | P2 <sub>1</sub> /c                                                |
| <i>a</i> /Å                                 | 14.0511(15)                                                       |
| <i>b</i> /Å                                 | 14.6234(15)                                                       |
| <i>c</i> /Å                                 | 13.0285(15)                                                       |
| <i>α</i> /°                                 | 90                                                                |
| <i>β</i> /°                                 | 90.05(2)                                                          |
| <i>γ</i> /°                                 | 90                                                                |
| Volume/Å <sup>3</sup>                       | 2677.0(5)                                                         |
| <i>Z</i>                                    | 4                                                                 |
| ρ <sub>calc</sub> /cm <sup>3</sup>          | 1.491                                                             |
| Radiation                                   | MoKα (λ = 0.71073)                                                |
| 2θ range for data collection/°              | 4.02 to 67.432                                                    |
| Index ranges                                | −21 ≤ <i>h</i> ≤ 20, −21 ≤ <i>k</i> ≤ 21, −18 ≤ <i>l</i> ≤ 20     |
| Reflections collected                       | 83186                                                             |
| Independent reflections                     | 9315 [R <sub>int</sub> = 0.0888, R <sub>sigma</sub> = 0.0572]     |
| Data/restraints/parameters                  | 9315/0/201                                                        |
| Goodness-of-fit on F <sup>2</sup>           | 1.095                                                             |
| Final R indexes [I >= 2σ (I)]               | R <sub>1</sub> = 0.0354, wR <sub>2</sub> = 0.0789                 |
| Final R indexes [all data]                  | R <sub>1</sub> = 0.0845, wR <sub>2</sub> = 0.0959                 |
| Largest diff. peak/hole / e Å <sup>−3</sup> | 0.62/−2.81                                                        |

**Table S2.** Fractional Atomic Coordinates ( $\times 10^4$ ) and Equivalent Isotropic Displacement Parameters ( $\text{\AA}^2 \times 10^3$ ) for  $(\text{C}_8\text{H}_{20}\text{N})_2\text{TeCl}_6$  at 193.15 K.  $U_{\text{eq}}$  is defined as 1/3 of the trace of the orthogonalized  $U_{ij}$  tensor.

| Atom. | <i>x</i>   | <i>y</i>   | <i>z</i>   | $U_{\text{eq}}$ |
|-------|------------|------------|------------|-----------------|
| N2    | 7486.4(11) | 2427.4(13) | 2506.2(12) | 29.3(4)         |
| C15   | 7812.7(16) | 1835.9(16) | 1609.6(17) | 37.7(5)         |
| C11   | 7156.1(16) | 1851.6(15) | 3416.3(17) | 37.1(5)         |
| C9    | 6661.9(16) | 3017.7(16) | 2154.5(18) | 38.8(5)         |
| C13   | 8319.0(16) | 3010.9(15) | 2846.6(17) | 37.4(5)         |
| C16   | 8548.6(19) | 1118.5(18) | 1868(2)    | 52.2(7)         |
| C14   | 8079(2)    | 3713.8(17) | 3664.8(19) | 51.2(7)         |
| C12   | 6395.3(19) | 1156.5(18) | 3176(2)    | 54.2(7)         |
| C10   | 6917(2)    | 3718.8(18) | 1336.1(19) | 51.4(7)         |
| N1    | 2421.5(12) | 2387.6(13) | 2346.1(13) | 33.7(4)         |
| C2    | 2057.1(16) | 2277.6(15) | 1256.6(16) | 36.0(5)         |
| C7    | 3048.9(17) | 3233.1(16) | 2367.5(19) | 43.7(6)         |
| C4    | 1617.2(17) | 2510.2(15) | 3118.7(18) | 40.1(5)         |
| C1    | 1333.1(18) | 1523.0(16) | 1106.7(19) | 44.2(6)         |
| C3    | 947.6(18)  | 3288.2(17) | 2901(2)    | 49.3(6)         |
| C5    | 2967(2)    | 1536.1(16) | 2629.1(18) | 47.5(6)         |
| C6    | 3464(2)    | 1564(2)    | 3662(2)    | 57.0(8)         |
| C8    | 3941.2(19) | 3185(2)    | 1718(2)    | 66.8(9)         |
| Te2   | 10000      | 5000       | 0          | 26.14(5)        |
| Te1   | 5000       | 5000       | 5000       | 28.02(5)        |
| Cl5   | 9464.6(4)  | 5064.5(3)  | 1862.8(4)  | 37.26(12)       |
| Cl2   | 5386.1(5)  | 3299.3(4)  | 5071.9(5)  | 45.52(14)       |
| Cl3   | 3259.4     | 4630.7     | 4670.4     | 44              |
| Cl1   | 5352.4     | 4953.9     | 3092       | 40              |
| Cl4   | 8282.2     | 5260.7     | -518.1     | 39              |
| Cl6   | 9698.1     | 3276.1     | -9.8       | 38              |

**Table S3.** Anisotropic Displacement Parameters ( $\text{\AA}^2 \times 10^3$ ) for  $(\text{C}_8\text{H}_{20}\text{N})_2\text{TeCl}_6$ . The Anisotropic displacement factor exponent takes the form:  $-2\pi^2[\text{h}^2\text{a}^*\text{U}_{11} + 2\text{hka}^*\text{b}^*\text{U}_{12} + \dots]$ .

| Atom | Atom      | Length/ $\text{\AA}$ | Atom      | Atom      | Length/ $\text{\AA}$ |           |
|------|-----------|----------------------|-----------|-----------|----------------------|-----------|
| N2   | 29.0(9)   | 31.4(9)              | 27.4(9)   | -0.6(7)   | -0.5(7)              | 1.1(7)    |
| C15  | 40.3(13)  | 38.1(12)             | 34.7(12)  | -7.1(9)   | 2.1(10)              | 4.6(10)   |
| C11  | 38.7(12)  | 37.1(12)             | 35.5(13)  | 5.3(9)    | 2.0(10)              | -3.3(10)  |
| C9   | 35.8(12)  | 42.7(12)             | 37.9(13)  | -1.0(10)  | -3.7(10)             | 11.0(10)  |
| C13  | 36.6(12)  | 37.4(11)             | 38.1(13)  | 1.0(10)   | -3.0(10)             | -7.6(10)  |
| C16  | 50.4(15)  | 50.6(14)             | 55.7(17)  | -3.4(13)  | 3.4(13)              | 19.0(13)  |
| C14  | 71.1(19)  | 44.7(14)             | 37.6(14)  | -4.8(11)  | 1.1(13)              | -18.9(13) |
| C12  | 46.7(15)  | 49.6(15)             | 66.3(19)  | 11.0(13)  | 2.1(13)              | -15.1(13) |
| C10  | 66.0(18)  | 49.7(15)             | 38.4(14)  | 8.6(11)   | -1.3(12)             | 19.3(13)  |
| N1   | 38.5(11)  | 32.6(9)              | 29.9(10)  | -3.2(7)   | -1.3(8)              | 6.2(8)    |
| C2   | 42.7(13)  | 35.2(11)             | 30.2(12)  | 0.2(9)    | -0.8(10)             | 1.5(10)   |
| C7   | 39.7(13)  | 43.9(13)             | 47.3(15)  | -11.8(11) | -1.6(11)             | -1.8(11)  |
| C4   | 44.1(13)  | 41.7(12)             | 34.4(12)  | 2.2(10)   | 9.5(10)              | 5.6(11)   |
| C1   | 50.5(15)  | 40.6(13)             | 41.5(14)  | 1.2(10)   | -5.4(11)             | -7.4(11)  |
| C3   | 40.5(14)  | 53.7(15)             | 53.7(16)  | 1.8(13)   | 12.0(12)             | 11.7(12)  |
| C5   | 56.6(16)  | 42.0(13)             | 43.8(15)  | -5.0(11)  | -7.5(12)             | 20.8(12)  |
| C6   | 60.4(18)  | 65.1(18)             | 45.4(16)  | -2.1(13)  | -11.8(13)            | 22.2(15)  |
| C8   | 39.4(15)  | 89(2)                | 72(2)     | -23.1(17) | 8.4(14)              | -19.1(15) |
| Te2  | 28.49(10) | 21.97(9)             | 27.95(10) | -0.44(7)  | 1.25(7)              | -0.36(7)  |
| Te1  | 28.35(10) | 26.30(9)             | 29.39(10) | 1.06(7)   | 2.21(8)              | -0.06(7)  |
| Cl5  | 44.8(3)   | 35.7(3)              | 31.2(3)   | -2.0(2)   | 5.9(2)               | -0.9(2)   |
| Cl2  | 56.3(4)   | 29.9(3)              | 50.4(4)   | 4.1(2)    | 2.5(3)               | 4.5(3)    |
| Cl3  | 32        | 52                   | 48        | -9        | 2                    | -4        |
| Cl1  | 44        | 43                   | 32        | 1         | 4                    | -1        |
| Cl4  | 33        | 36                   | 47        | 3         | -4                   | 1         |
| Cl6  | 45        | 26                   | 45        | -1        | 1                    | -2        |

**Table S4.** Bond Lengths for  $(\text{C}_8\text{H}_{20}\text{N})_2\text{TeCl}_6$ .

| Atom | Atom | Length/ $\text{\AA}$ | Atom | Atom             | Length/ $\text{\AA}$ |
|------|------|----------------------|------|------------------|----------------------|
| N2   | C15  | 1.524(3)             | C4   | C3               | 1.503(3)             |
| N2   | C11  | 1.527(3)             | C5   | C6               | 1.516(3)             |
| N2   | C9   | 1.515(3)             | Te2  | Cl5              | 2.5432(7)            |
| N2   | C13  | 1.514(3)             | Te2  | Cl5 <sup>1</sup> | 2.5432(7)            |
| C15  | C16  | 1.511(3)             | Te2  | Cl4              | 2.5346               |
| C11  | C12  | 1.508(3)             | Te2  | Cl4 <sup>1</sup> | 2.5346               |
| C9   | C10  | 1.522(3)             | Te2  | Cl6              | 2.5564               |
| C13  | C14  | 1.519(3)             | Te2  | Cl6 <sup>1</sup> | 2.5565               |
| N1   | C2   | 1.517(3)             | Te1  | Cl2              | 2.5473(6)            |
| N1   | C7   | 1.519(3)             | Te1  | Cl2 <sup>2</sup> | 2.5472(6)            |
| N1   | C4   | 1.525(3)             | Te1  | Cl3              | 2.5408               |
| N1   | C5   | 1.508(3)             | Te1  | Cl3 <sup>2</sup> | 2.5408               |
| C2   | C1   | 1.513(3)             | Te1  | Cl1 <sup>2</sup> | 2.5360               |
| C7   | C8   | 1.514(3)             | Te1  | Cl1              | 2.5360               |

**Table S5.** Bond Angles for  $(\text{C}_8\text{H}_{20}\text{N})_2\text{TeCl}_6$ .

| Atom | Atom | Atom | Angle/ $^\circ$ | Atom             | Atom | Atom             | Angle/ $^\circ$ |
|------|------|------|-----------------|------------------|------|------------------|-----------------|
| C15  | N2   | C11  | 111.96(18)      | Cl4              | Te2  | Cl5              | 88.06(2)        |
| C9   | N2   | C15  | 108.78(15)      | Cl4              | Te2  | Cl5 <sup>1</sup> | 91.94(2)        |
| C9   | N2   | C11  | 108.43(16)      | Cl4 <sup>1</sup> | Te2  | Cl5              | 91.94(2)        |
| C13  | N2   | C15  | 108.14(16)      | Cl4 <sup>1</sup> | Te2  | Cl5 <sup>1</sup> | 88.06(2)        |
| C13  | N2   | C11  | 108.58(15)      | Cl4              | Te2  | Cl4 <sup>1</sup> | 180.0           |
| C13  | N2   | C9   | 110.97(18)      | Cl4 <sup>1</sup> | Te2  | Cl6              | 90.6            |
| C16  | C15  | N2   | 115.43(19)      | Cl4              | Te2  | Cl6 <sup>1</sup> | 90.6            |
| C12  | C11  | N2   | 115.25(19)      | Cl4              | Te2  | Cl6              | 89.4            |
| N2   | C9   | C10  | 114.50(19)      | Cl4 <sup>1</sup> | Te2  | Cl6 <sup>1</sup> | 89.4            |

|                  |     |                  |            |                  |     |                  |            |
|------------------|-----|------------------|------------|------------------|-----|------------------|------------|
| N2               | C13 | C14              | 114.50(19) | Cl6              | Te2 | Cl6 <sup>1</sup> | 180.0      |
| C2               | N1  | C7               | 107.39(17) | Cl2 <sup>2</sup> | Te1 | Cl2              | 180.0      |
| C2               | N1  | C4               | 112.36(17) | Cl3 <sup>2</sup> | Te1 | Cl2 <sup>2</sup> | 90.209(15) |
| C7               | N1  | C4               | 108.83(17) | Cl3              | Te1 | Cl2              | 90.208(15) |
| C5               | N1  | C2               | 108.20(17) | Cl3 <sup>2</sup> | Te1 | Cl2              | 89.791(16) |
| C5               | N1  | C7               | 111.90(18) | Cl3              | Te1 | Cl2 <sup>2</sup> | 89.792(15) |
| C5               | N1  | C4               | 108.21(18) | Cl3 <sup>2</sup> | Te1 | Cl3              | 180.0      |
| C1               | C2  | N1               | 115.11(18) | Cl1 <sup>2</sup> | Te1 | Cl2 <sup>2</sup> | 88.186(14) |
| C8               | C7  | N1               | 115.6(2)   | Cl1              | Te1 | Cl2              | 88.187(15) |
| C3               | C4  | N1               | 115.39(19) | Cl1              | Te1 | Cl2 <sup>2</sup> | 91.814(14) |
| N1               | C5  | C6               | 115.4(2)   | Cl1 <sup>2</sup> | Te1 | Cl2              | 91.812(15) |
| Cl5              | Te2 | Cl5 <sup>1</sup> | 180.0      | Cl1              | Te1 | Cl3              | 91.0       |
| Cl5              | Te2 | Cl6              | 89.548(12) | Cl1 <sup>2</sup> | Te1 | Cl3              | 89.0       |
| Cl5 <sup>1</sup> | Te2 | Cl6              | 90.453(12) | Cl1 <sup>2</sup> | Te1 | Cl3 <sup>2</sup> | 91.0       |
| Cl5 <sup>1</sup> | Te2 | Cl6 <sup>1</sup> | 89.546(12) | Cl1              | Te1 | Cl3 <sup>2</sup> | 89.0       |
| Cl5              | Te2 | Cl6 <sup>1</sup> | 90.453(12) | Cl1              | Te1 | Cl1 <sup>2</sup> | 180.0      |

**Table S6.** Torsion Angles for (C<sub>8</sub>H<sub>20</sub>N)<sub>2</sub>TeCl<sub>6</sub>.

| A   | B  | C   | D   | Angle/°    | A  | B  | C  | D  | Angle/°    |
|-----|----|-----|-----|------------|----|----|----|----|------------|
| C15 | N2 | C11 | C12 | -54.5(2)   | C2 | N1 | C7 | C8 | -64.0(3)   |
| C15 | N2 | C9  | C10 | -65.4(2)   | C2 | N1 | C4 | C3 | -55.8(3)   |
| C15 | N2 | C13 | C14 | 173.85(19) | C2 | N1 | C5 | C6 | 174.4(2)   |
| C11 | N2 | C15 | C16 | -52.6(2)   | C7 | N1 | C2 | C1 | 173.91(19) |
| C11 | N2 | C9  | C10 | 172.7(2)   | C7 | N1 | C4 | C3 | 63.0(3)    |
| C11 | N2 | C13 | C14 | -64.5(2)   | C7 | N1 | C5 | C6 | 56.3(3)    |
| C9  | N2 | C15 | C16 | -172.5(2)  | C4 | N1 | C2 | C1 | -54.3(3)   |
| C9  | N2 | C11 | C12 | 65.5(2)    | C4 | N1 | C7 | C8 | 174.2(2)   |
| C9  | N2 | C13 | C14 | 54.6(2)    | C4 | N1 | C5 | C6 | -63.6(3)   |
| C13 | N2 | C15 | C16 | 66.9(2)    | C5 | N1 | C2 | C1 | 65.1(2)    |
| C13 | N2 | C11 | C12 | -173.8(2)  | C5 | N1 | C7 | C8 | 54.6(3)    |
| C13 | N2 | C9  | C10 | 53.5(2)    | C5 | N1 | C4 | C3 | -175.2(2)  |
| C15 | N2 | C11 | C12 | -54.5(2)   | C2 | N1 | C7 | C8 | -64.0(3)   |
| C15 | N2 | C9  | C10 | -65.4(2)   | C2 | N1 | C4 | C3 | -55.8(3)   |
| C15 | N2 | C13 | C14 | 173.85(19) | C2 | N1 | C5 | C6 | 174.4(2)   |
| C11 | N2 | C15 | C16 | -52.6(2)   | C7 | N1 | C2 | C1 | 173.91(19) |
| C11 | N2 | C9  | C10 | 172.7(2)   | C7 | N1 | C4 | C3 | 63.0(3)    |
| C11 | N2 | C13 | C14 | -64.5(2)   | C7 | N1 | C5 | C6 | 56.3(3)    |
| C9  | N2 | C15 | C16 | -172.5(2)  | C4 | N1 | C2 | C1 | -54.3(3)   |
| C9  | N2 | C11 | C12 | 65.5(2)    | C4 | N1 | C7 | C8 | 174.2(2)   |

**Table S7.** Hydrogen Atom Coordinates (Å × 10<sup>4</sup>) and Isotropic Displacement Parameters (Å<sup>2</sup> × 10<sup>3</sup>) for (C<sub>8</sub>H<sub>20</sub>N)<sub>2</sub>TeCl<sub>6</sub>.

| Atom | x       | y       | z       | U <sub>eq</sub> |
|------|---------|---------|---------|-----------------|
| H15A | 7248.85 | 1526.04 | 1314.77 | 45              |
| H15B | 8077.21 | 2241.01 | 1072.03 | 45              |
| H11A | 7714.33 | 1527.13 | 3703.56 | 45              |
| H11B | 6912.96 | 2267.94 | 3954.86 | 45              |
| H9A  | 6399.44 | 3343.62 | 2757.13 | 47              |
| H9B  | 6154.67 | 2615.1  | 1882.04 | 47              |
| H13A | 8578.11 | 3333.73 | 2240.15 | 45              |
| H13B | 8825.36 | 2604.53 | 3113.72 | 45              |
| H16A | 8718.93 | 780.35  | 1245.45 | 78              |
| H16B | 8286.98 | 694.39  | 2377.5  | 78              |
| H16C | 9117.19 | 1415.29 | 2149.39 | 78              |
| H14A | 7608.27 | 4145.78 | 3393.58 | 77              |

|      |         |         |         |     |
|------|---------|---------|---------|-----|
| H14B | 8656.8  | 4045.78 | 3860.85 | 77  |
| H14C | 7815.92 | 3403.32 | 4267.94 | 77  |
| H12A | 6627.43 | 735.05  | 2647.81 | 81  |
| H12B | 5824.37 | 1470.37 | 2925.46 | 81  |
| H12C | 6239.53 | 812.17  | 3799.09 | 81  |
| H10A | 7197.42 | 3406.51 | 743.26  | 77  |
| H10B | 7377.56 | 4155.85 | 1617.3  | 77  |
| H10C | 6341.75 | 4045.23 | 1120.89 | 77  |
| H2A  | 1767.58 | 2863.01 | 1036.84 | 43  |
| H2B  | 2606.44 | 2157.13 | 800.97  | 43  |
| H7A  | 2665.94 | 3762.12 | 2134.42 | 52  |
| H7B  | 3238.36 | 3351.33 | 3087.44 | 52  |
| H4A  | 1243.78 | 1936.57 | 3144.7  | 48  |
| H4B  | 1900.65 | 2604.77 | 3806.5  | 48  |
| H1A  | 1140.15 | 1501.03 | 384.12  | 66  |
| H1B  | 774.81  | 1643.73 | 1536.12 | 66  |
| H1C  | 1615.67 | 935.68  | 1302.79 | 66  |
| H3A  | 630.61  | 3185.47 | 2240.99 | 74  |
| H3B  | 1306.31 | 3862.37 | 2874.49 | 74  |
| H3C  | 469.2   | 3323.9  | 3446.81 | 74  |
| H5A  | 3449.84 | 1420.85 | 2091.75 | 57  |
| H5B  | 2520.38 | 1012.3  | 2626.14 | 57  |
| H6A  | 3875.86 | 2104.66 | 3695.18 | 85  |
| H6B  | 3850.27 | 1011.56 | 3747.38 | 85  |
| H6C  | 2988.1  | 1595.58 | 4209.71 | 85  |
| H8A  | 3764.91 | 3112.39 | 995.08  | 100 |
| H8B  | 4327.52 | 2661.61 | 1936.16 | 100 |
| H8C  | 4308.5  | 3749.48 | 1804.15 | 100 |

**Table S8.** PL lifetimes of  $(\text{C}_8\text{H}_{20}\text{N})_2\text{TeCl}_6$ .

| $\lambda_{\text{ex}}$ (nm) | $\lambda_{\text{em}}$ (nm) | PL lifetime (ns) |
|----------------------------|----------------------------|------------------|
| 405                        | 540                        | 223.80           |
| 405                        | 550                        | 225.40           |
| 405                        | 560                        | 230.01           |
| 405                        | 570                        | 228.94           |
| 405                        | 580                        | 232.49           |
| 405                        | 590                        | 229.80           |
| 405                        | 600                        | 236.43           |
| 405                        | 610                        | 234.74           |
| 405                        | 620                        | 237.18           |
| 405                        | 630                        | 236.95           |
| 405                        | 640                        | 237.71           |
| 405                        | 650                        | 236.23           |
| 405                        | 660                        | 237.24           |

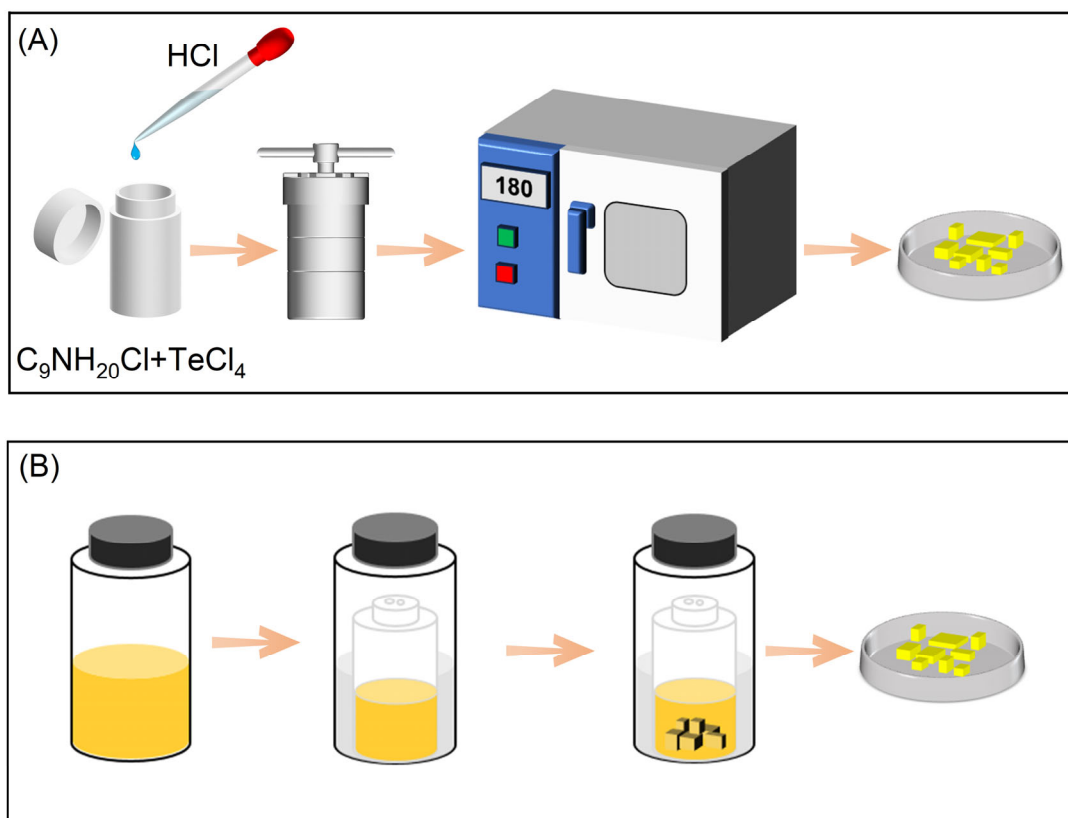

Figure S1. Diagram of synthesis of  $(C_8H_{20}N)_2TeCl_6$  single crystals.

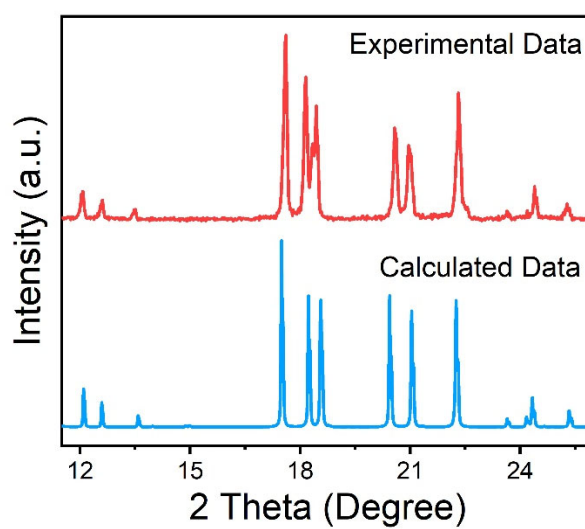

Figure S2. PXRD patterns of  $(C_8H_{20}N)_2TeCl_6$  as well as its simulated result.

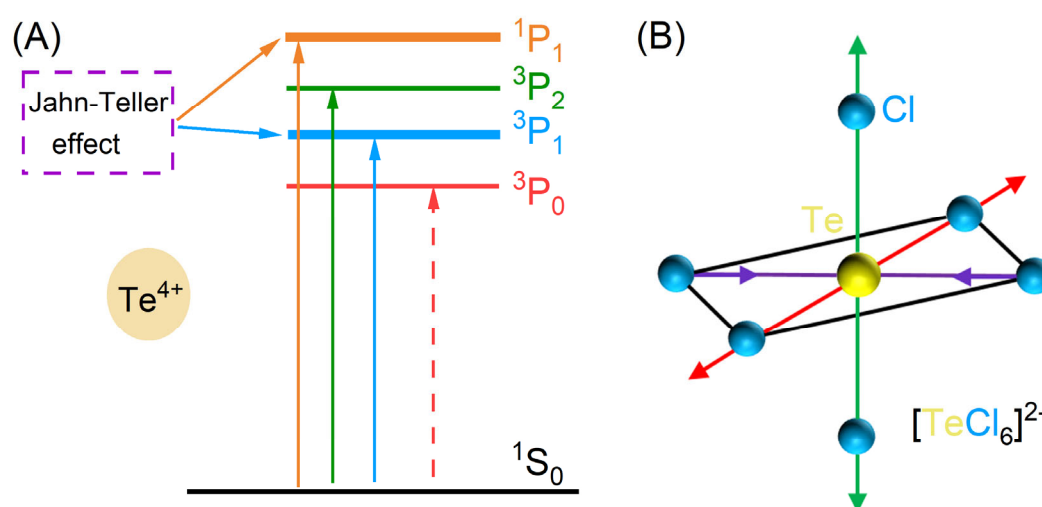

**Figure S3.** (a) Scheme of the energy level of (C<sub>8</sub>H<sub>20</sub>N)<sub>2</sub>TeCl<sub>6</sub>. (b) The *v*<sub>2</sub> vibration mode of [TeCl<sub>6</sub>]<sup>2-</sup> octahedra.

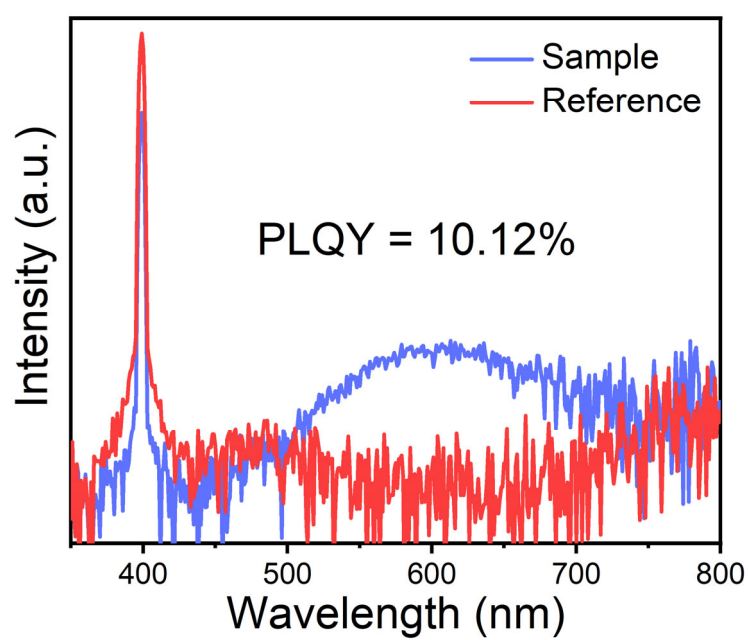

**Figure S4.** PLQY of  $(\text{C}_8\text{H}_{20}\text{N})_2\text{TeCl}_6$  at room temperature.
